# Supplementary material for: Intestinal SIRT3 overexpression in mice improves whole body glucose homeostasis independent of body weight
Source: PubMed Central journal article supplement — Mol Metab. 2017 Jul 18;6(10):1264–73. doi: 10.1016/j.molmet.2017.07.009 (PMC5641632; doi:10.1016/j.molmet.2017.07.009), 2017-07-18
Supplement: mmc1.pdf [file mmc1.pdf]

**SUPPLEMENTARY TABLES**

**Sup table 1: Antibodies for western blotting**

| Antibody                                 | Molecular weight | Catalog # | Company                    | Working Dilution |
|------------------------------------------|------------------|-----------|----------------------------|------------------|
| Sirtuin3 (SIRT3)                         | 28 kDa           | 5490      | Cell Signalling Technology | 1:1000           |
| Voltage-dependent anion channel (VDAC)   | 32 kDa           | 4661      | Cell Signalling Technology | 1:1000           |
| Cytochrome-c oxidase subunit-IV (COX IV) | 17 kDa           | 4844      | Cell Signalling Technology | 1:1000           |
| Anti-rabbit IgG, HRP-linked              |                  | 7074      | Cell Signalling Technology | 1:2000           |

**Sup table 2: Primers for RTqPCR analyses**

| Gene name                                                                       | Primers                                                          |
|---------------------------------------------------------------------------------|------------------------------------------------------------------|
| 3-Hydroxy-3-methylglutaryl-CoA synthase 2 (Hmgcs2)                              | F: 5' agataccaccaacgcctgtt 3'<br>R: 5' aatgtcaccacagaccacca 3'   |
| Carnitine palmitoyltransferase 1a, liver (CPT1a)                                | F: 5' gacgaatcggaacagggata 3'<br>R: 5' tggactgtcaaaccacctg 3'    |
| ATP synthase (ATPsyn)                                                           | F: 5' aggatgcaatcgacatgga 3'<br>R: 5' aaggccagggcaatgttatt 3'    |
| Long chain acyl CoA dehydrogenase (Lcad)                                        | F: 5' gtctggactccggttctgc 3'<br>R: 5' ccgtggagttgcacacatt 3'     |
| Peroxisome proliferative activated receptor, gamma, coactivator 1 alpha (Pgc1a) | F: 5' ttctgacacaggtcgtgtt 3'<br>R: 5' gtgtgcggtgtctgtagtg 3'     |
| Peptidylprolyl Isomerase B (Ppib)                                               | F: 5' ttctcataaccacagtcagacc 3'<br>R: 5' accttcggtaccacatccat-3' |
